# Supplementary material
Source: PubMed Central journal article supplement (PMC6726562)
Supplement: NIHMS1531774-supplement-1.pdf [file NIHMS1531774-supplement-1.pdf]

**Figure S1: Associations (unadjusted) between individual miRNA and Breast cancer outcomes in WHEL and TCGA samples**

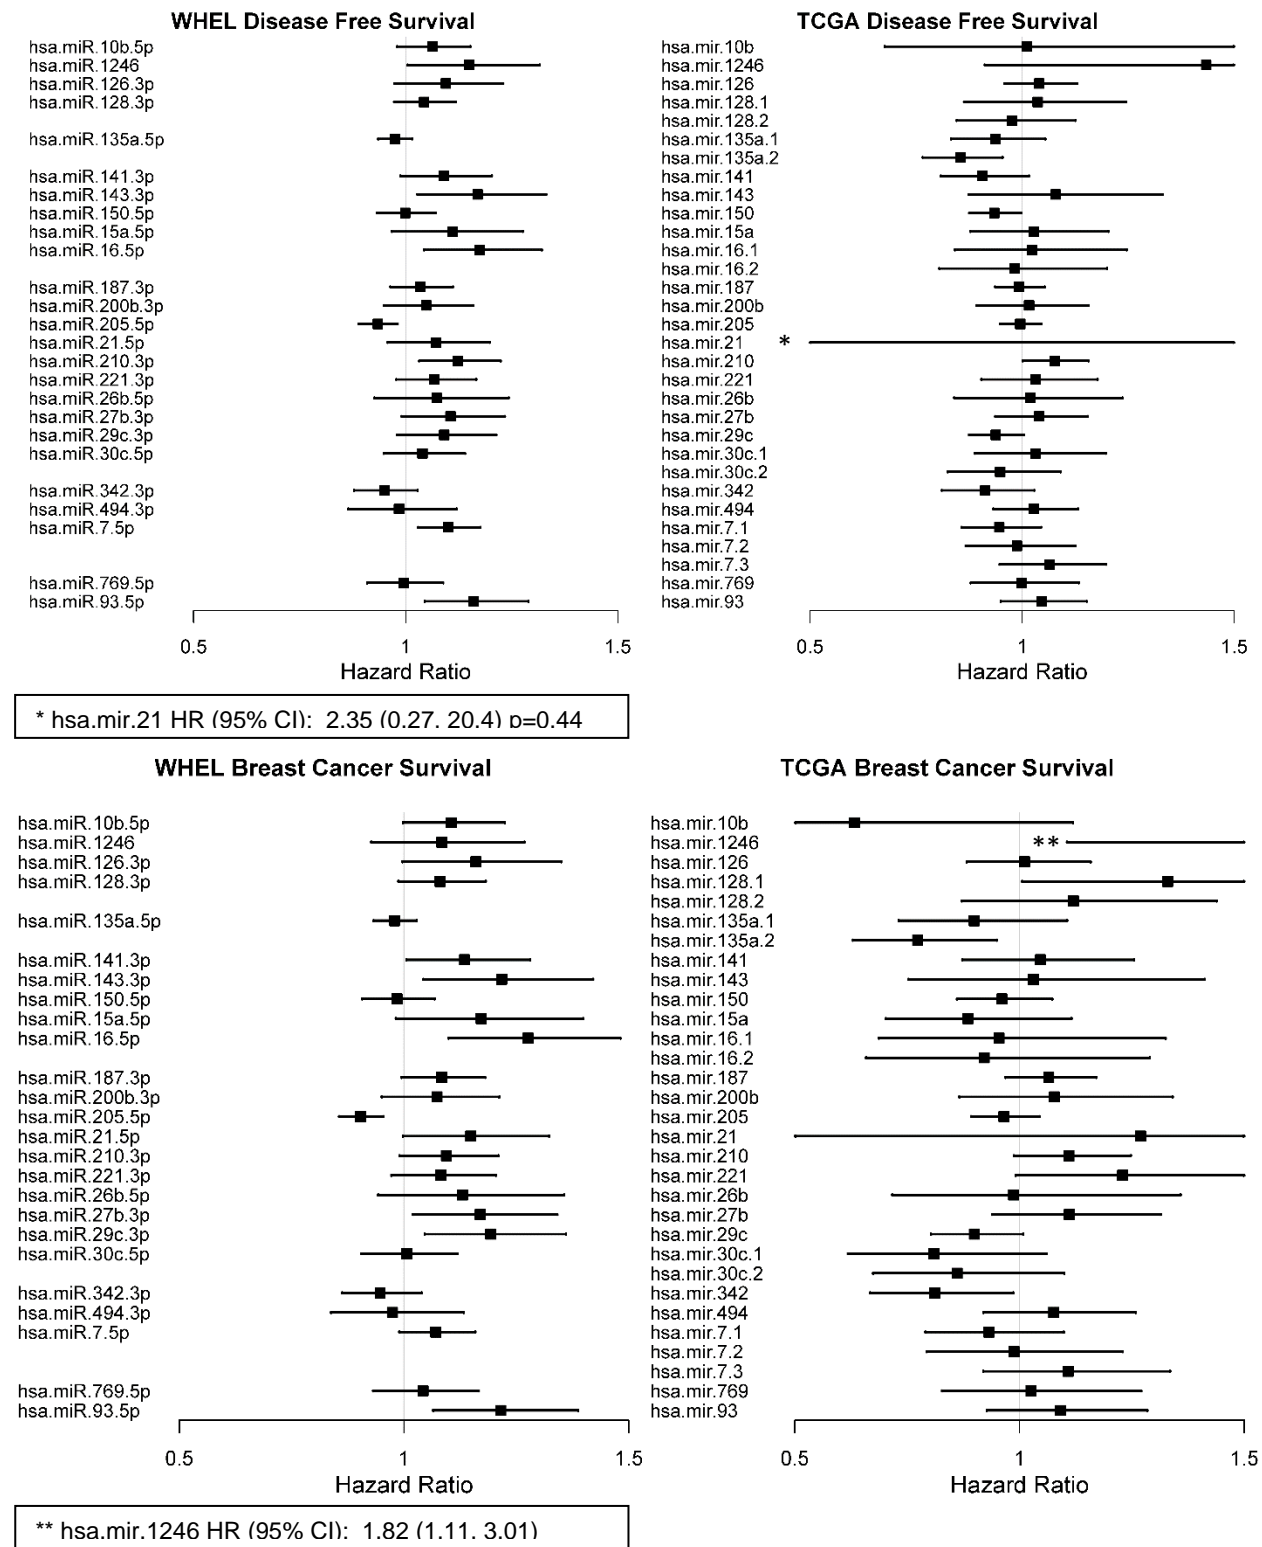

Figure S1: Associations (unadjusted) between individual miRNA and Breast cancer outcomes in WHEL and TCGA samples
